# Supplementary material
Source: HighWire-hosted journal article supplement (https://mentalhealth.bmj.com/content/24/3/97)

## Appendix

eTable 1. Selected characteristics of included studies

| Studies                        | Country                | N included | Age, mean (SD) | Sex (percentage female) | Main eligibility criteria                          | Baseline severity in PHQ-9, mean (SD) | Treatments                                              | Duration (weeks) |
|--------------------------------|------------------------|------------|----------------|-------------------------|----------------------------------------------------|---------------------------------------|---------------------------------------------------------|------------------|
| Buntrock et al (2015) (1)      | Germany, community     | 406        | 45.1 (11.9)    | 73.9%                   | CES-D $\geq$ 16 but not MDD according to SCID      | 11.2 (3.9), converted from CES-D      | iCBT vs CAU                                             | 6                |
| Gilbody et al (2017) (2)       | UK, primary care       | 454        | 40.8 (13.8)    | 64.5%                   | PHQ-9 $\geq$ 10                                    | 16.4 (4.0)                            | guided iCBT vs unguided iCBT                            | 16               |
| Kessler et al (2009) (3)       | UK, primary care       | 294        | 35.0 (11.6)    | 68.0%                   | MDD according to CIS-R and BDI $\geq$ 14           | 20.7 (3.6), converted from BDI-II     | online CBT vs WL                                        | 16               |
| Kivi et al (2014) (4)          | Sweden, primary care   | 88         | 35.8 (11.7)    | 69.5%                   | MDD according to MINI and MADRS-S $<$ 35           | 13.9 (4.6), converted from BDI-II     | iCBT vs CAU                                             | 12               |
| Kleiboer et al (2015) (5)      | Netherlands, community | 426        | 43.9 (13.8)    | 64.9%                   | CES-D $\geq$ 16 and HADS anxiety subscale $\geq$ 8 | 10.3 (4.3)                            | iPST with various support vs non-specific support vs WL | 6                |
| Montero-Marín et al (2016) (6) | Spain, primary care    | 297        | 42.9 (10.3)    | 75.7%                   | MDD according to MINI and BDI-II $\geq$ 14         | 11.8 (2.9), converted from BDI-II     | guided iCBT vs unguided iCBT vs CAU                     | 12               |
| Philips et al (2014) (7)       | UK, workplace          | 492        | 42.7 (9.1)     | 55.1%                   | PHQ-9 $\geq$ 10                                    | 14.9 (5.4)                            | iCBT vs information                                     | 6                |

BDI: Beck Depression Inventory, BDI-II, Beck Depression Inventory 2<sup>nd</sup> Version, CAU: Care as usual, CES-D: Center for Epidemiologic Studies Depression Scale, CIS-R: Clinical Interview Schedule Revised, HADS: Hospital Anxiety and Depression Scale, iCBT: internet cognitive-behavioral therapy, iPST: internet problem-solving therapy, MADRS: Montgomery Åsberg

Depression Rating Scale – self rating version, MDD: Major depressive disorder, MINI: MINI-International Neuropsychiatric Interview, PHQ-9: Patient Health Questionnaire-9, WL: Waiting list

## REFERENCES

1. Buntrock C, Ebert D, Lehr D, Riper H, Smit F, Cuijpers P, et al. Effectiveness of a web-based cognitive behavioural intervention for subthreshold depression: pragmatic randomised controlled trial. *Psychother Psychosom*. 2015; 84(6): 348-58.
2. Gilbody S, Brabyn S, Lovell K, Kessler D, Devlin T, Smith L, et al. Telephone-supported computerised cognitive-behavioural therapy: REEACT-2 large-scale pragmatic randomised controlled trial. *Br J Psychiatry*. 2017.
3. Kessler D, Lewis G, Kaur S, Wiles N, King M, Weich S, et al. Therapist-delivered internet psychotherapy for depression in primary care: a randomised controlled trial. *Lancet*. 2009; 374(9690): 628-34.
4. Kivi M, Eriksson MCM, Hange D, Petersson E-L, Vernmark K, Johansson B, et al. Internet-based therapy for mild to moderate depression in Swedish primary care: Short term results from the PRIM-NET randomized controlled trial. *Cogn Behav Ther*. 2014; 43(4): 289-98.
5. Kleiboer A, Donker T, Seekles W, van Straten A, Riper H, Cuijpers P. A randomized controlled trial on the role of support in Internet-based problem solving therapy for depression and anxiety. *Behav Res Ther*. 2015; 72: 63-71.
6. Montero-Marin J, Araya R, Perez-Yus MC, Mayoral F, Gili M, Botella C, et al. An Internet-Based Intervention for Depression in Primary Care in Spain: A Randomized Controlled Trial. *J Med Internet Res*. 2016; 18(8): e231.
7. Phillips R, Schneider J, Molosankwe I, Leese M, Foroushani PS, Grime P, et al. Randomized controlled trial of computerized cognitive behavioural therapy for depressive symptoms: effectiveness and costs of a workplace intervention. *Psychol Med*. 2014; 44(4): 741-52.

eFigure 1. PHQ-9 and EQ-5D total scores at baseline and endpoint excluding studies that used converted PHQ-9 scores

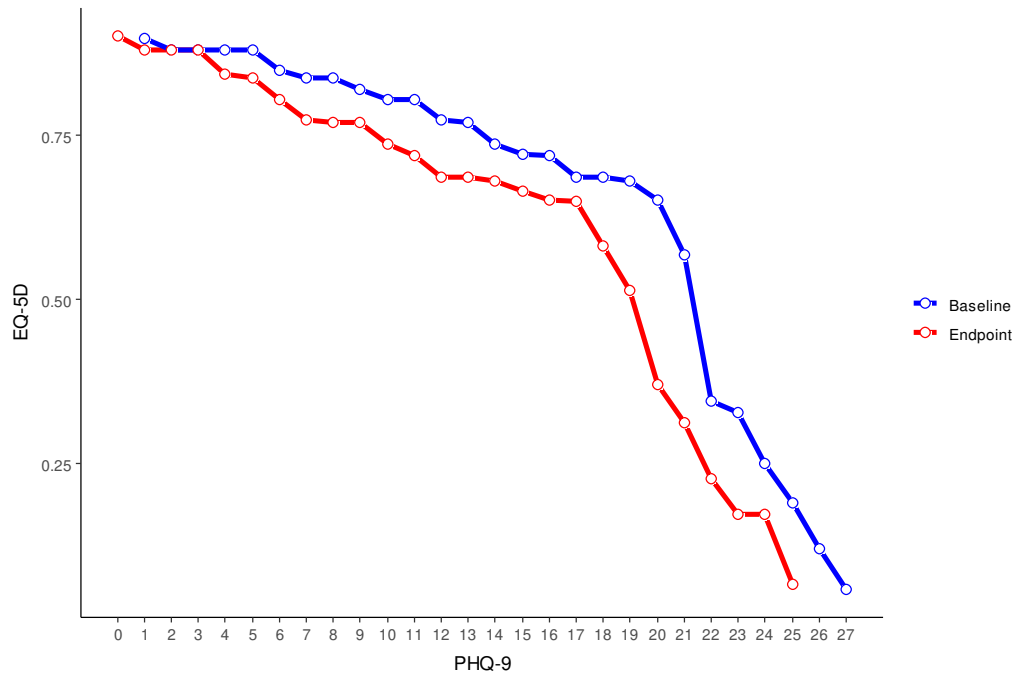

Supplement: inline-supplementary-material-1 [file inline-supplementary-material-1.pdf]
